# Supplementary material
Source: publisher site journal article supplement (https://www.dovepress.com/article/supplementary_file/556975/556975%20Revised%20_Supplementary%20Table%201_1.xlsx)
Supplement: Supplementary file 1 [file 556975%20Revised%20_Supplementary%20Table%201_1.xlsx]

## Sheet: bootstrap_correction_results
Supplementary Table 1. Comparison of ROC curves before and after bootstrapping correction.
Metric	Original_Value	Corrected_Value	Corrected_95CI	Optimism_Bias	Relative_Optimism
AUC	0.662	0.661	[0.567, 0.764]	0.001	0.002
Sensitivity	0.649	0.646	[0.297, 0.893]	0.002	0.004
Specificity	0.636	0.602	[0.403, 1.038]	0.034	0.053
Youden_Index	0.284	0.248	[0.087, 0.396]	0.036	0.126
HDL_Cutoff	0.86	0.85	[0.85, 0.86]	0.01	0.012
